# Supplementary material for: Real-World Treatment Patterns of Glucose-Lowering Agents Among Patients with Type 2 Diabetes Mellitus and Cardiovascular Disease or At Risk for Cardiovascular Disease: An Observational, Cross-Sectional, Retrospective Study
Source: Springer Nature journal article supplement (doi:10.1007/s13300-022-01320-1), 2022-09-21
Supplement: MOESM1 [file 23522582]

**Title:** Real-World treatment patterns of glucose-lowering agents among patients with type 2 diabetes mellitus and cardiovascular disease or at risk for cardiovascular disease – an observational, cross-sectional, retrospective study

**Authors:** Radhika Nair,<sup>1</sup> Reema Mody,<sup>2</sup> Maria Yu,<sup>2</sup> Stuart Cowburn,<sup>1</sup> Manige Konig,<sup>2</sup> and Todd Prewitt<sup>3</sup>

**Affiliation:**

<sup>1</sup>Humana Healthcare Research, Inc., Louisville, KY, USA

<sup>2</sup>Eli Lilly and Company, Indianapolis, IN, USA

<sup>3</sup>Humana Inc., Louisville, KY, USA

**Corresponding author:**

Reema Mody

Value Evidence Outcomes – Diabetes,

Eli Lilly and Company,

893 S Delaware St

Indianapolis, IN 46225

Email ID: [mody\\_reema@lilly.com](mailto:mody_reema@lilly.com)

**SUPPLEMENTARY MATERIAL**

**Table S1: Diagnoses, Procedure and CPT/HCPCS Codes**

|                                     | <b>ICD9 diagnosis or procedure codes</b>         | <b>ICD10 diagnosis or procedure codes</b>              | <b>CPT/HCPCS</b>          | <b>Inpatient claim required</b> |
|-------------------------------------|--------------------------------------------------|--------------------------------------------------------|---------------------------|---------------------------------|
| <b>Inclusion/Exclusion Criteria</b> |                                                  |                                                        |                           |                                 |
| Type 2 diabetes                     | 250.x0, 250.x2                                   | E11                                                    |                           | No                              |
| Type 1 diabetes                     | 250.x1, 250.x3                                   | E10                                                    |                           | No                              |
| Kidney failure (stage V)            | 585.5                                            | N18.5                                                  |                           | No                              |
|                                     | 403.01                                           | I12.0                                                  |                           |                                 |
|                                     | 403.11                                           | I13.11                                                 |                           |                                 |
|                                     | 403.91                                           | I13.2                                                  |                           |                                 |
|                                     | 404.02                                           |                                                        |                           |                                 |
|                                     | 404.03                                           |                                                        |                           |                                 |
|                                     | 404.12                                           |                                                        |                           |                                 |
|                                     | 404.13                                           |                                                        |                           |                                 |
|                                     | 404.92                                           |                                                        |                           |                                 |
|                                     | 404.93                                           |                                                        |                           |                                 |
| ESRD                                | 585.6                                            | N18.6                                                  | HCPCS/CPT:<br>90960-90962 | No                              |
| Dialysis                            | V45.11                                           | Z49.0*                                                 | HCPCS/CPT:                | No                              |
|                                     | V45.12                                           | Z49.3*                                                 | 90935, 90937,             |                                 |
|                                     | V56.0                                            | Z99.2                                                  | 90940, 90945,             |                                 |
|                                     | V56.1                                            | Z91.15                                                 | 90947, 90989,             |                                 |
|                                     | V56.2                                            |                                                        | 90993, 90921,             |                                 |
|                                     | V56.3*                                           |                                                        | 90925, 90966,             |                                 |
|                                     | E87.91                                           |                                                        | 90970                     |                                 |
|                                     | 39.96 (procedure code)<br>54.98 (procedure code) |                                                        |                           |                                 |
| Kidney transplant                   | 996.81                                           | Z94                                                    | HCPCS/CPT:                | No                              |
|                                     | V42.0                                            | T86.10                                                 | BT29*                     |                                 |
|                                     | 55.6* (proc)                                     | T86.11                                                 | BT39*                     |                                 |
|                                     | 00.91                                            | T86.12                                                 | BT49*                     |                                 |
|                                     | 00.92                                            | T86.13                                                 | G9750                     |                                 |
|                                     | 00.93                                            | T86.19                                                 | G9748                     |                                 |
|                                     |                                                  | Z48.22                                                 |                           |                                 |
|                                     |                                                  | 0TY00Z0 (proc)                                         |                           |                                 |
|                                     |                                                  | 0TY00Z1 (proc)                                         |                           |                                 |
|                                     |                                                  | 0TY00Z2 (proc)                                         |                           |                                 |
|                                     |                                                  | 0TY10Z0 (proc)                                         |                           |                                 |
|                                     |                                                  | 0TY10Z1 (proc)                                         |                           |                                 |
|                                     |                                                  | 0TY10Z2 (proc)                                         |                           |                                 |
| <b>ASCVD and Heart Failure</b>      |                                                  |                                                        |                           |                                 |
| Myocardial infarction               | 410.xx Acute myocardial infarction               | I21.xx Acute MI                                        |                           | Yes                             |
|                                     | 412.xx Old myocardial infarction                 | I22.xx Subsequent ST elevation and non-ST elevation MI |                           | No                              |

|                                                            | <b>ICD9 diagnosis or procedure codes</b>                                 | <b>ICD10 diagnosis or procedure codes</b>                                                              | <b>CPT/HCPCS</b> | <b>Inpatient claim required</b> |
|------------------------------------------------------------|--------------------------------------------------------------------------|--------------------------------------------------------------------------------------------------------|------------------|---------------------------------|
|                                                            |                                                                          | I23.xx Certain complications following ST elevation and non-ST elevation MI (within the 28-day period) |                  | No                              |
| Acute coronary syndromes (excluding myocardial infarction) | 413.xx Angina Pectoris                                                   | I20.xx Angina pectoris                                                                                 |                  | Yes                             |
|                                                            | 411.xx Other acute and subacute forms of ischemic heart disease          | I24.xx Other acute ischemic heart diseases                                                             |                  | No                              |
|                                                            | 414.xx Other forms of chronic ischemic heart disease                     | I25.xx Chronic ischemic heart disease                                                                  |                  | No                              |
| Carotid Arterial Disease                                   | 433.1x Occlusion or stenosis of precerebral arteries, carotid artery     | I65.2x Occlusion and stenosis of carotid artery                                                        |                  | No                              |
|                                                            | 434.1x Occlusion of cerebral arteries; cerebral infarction               | I63.13 Cerebral infarction due to embolism of carotid artery                                           |                  | No                              |
|                                                            |                                                                          | I63.23 Cerebral infarction due to unspecified occlusion or stenosis of carotid arteries                |                  | No                              |
|                                                            | 437.3x Cerebral aneurysm, non-ruptured                                   | I67.1x Cerebral aneurysm, non-ruptured                                                                 |                  | No                              |
|                                                            | 442.81 Other aneurysm of other specified artery; artery of neck          | I72.0x Aneurysm of carotid artery                                                                      |                  | No                              |
| Transient ischemic attack                                  | 435.xx Transient cerebral ischemia                                       | G45.xx Transient cerebral ischemic attack and related syndromes                                        |                  | Yes                             |
| Coronary artery disease                                    | 414.01 Coronary atherosclerosis of native coronary artery                | I25.10 Atherosclerotic heart disease of native coronary artery                                         |                  | No                              |
| Heart failure                                              | 428.xx Heart failure                                                     | I50.xx Heart failure                                                                                   |                  | No                              |
| Unstable angina                                            | 411.xx Other acute and subacute forms of ischemic heart disease          | I20.0x Unstable angina                                                                                 |                  | No                              |
| Ischemic stroke                                            | 433.01 Occlusion and stenosis of basilar artery with cerebral infarction | I63.xx Cerebral infarction                                                                             |                  | Yes                             |
|                                                            | 433.11 Occlusion and stenosis of carotid artery with cerebral infarction |                                                                                                        |                  |                                 |
|                                                            | 433.21 Occlusion and stenosis of vertebral                               |                                                                                                        |                  |                                 |

|                           | ICD9 diagnosis or procedure codes                                                                     | ICD10 diagnosis or procedure codes                                                            | CPT/HCPCS | Inpatient claim required |
|---------------------------|-------------------------------------------------------------------------------------------------------|-----------------------------------------------------------------------------------------------|-----------|--------------------------|
|                           | artery with cerebral infarction                                                                       |                                                                                               |           |                          |
|                           | 433.31 Occlusion and stenosis of multiple and bilateral precerebral arteries with cerebral infarction |                                                                                               |           |                          |
|                           | 433.81 Occlusion and stenosis of other specified precerebral artery with cerebral infarction          |                                                                                               |           |                          |
|                           | 433.91 Occlusion and stenosis of unspecified precerebral artery with cerebral infarction              |                                                                                               |           |                          |
|                           | 434.01 Cerebral thrombosis with cerebral infarction                                                   |                                                                                               |           |                          |
|                           | 434.11 Cerebral embolism with cerebral infarction                                                     |                                                                                               |           |                          |
|                           | 434.91 Cerebral artery occlusion, unspecified with cerebral infarction                                |                                                                                               |           |                          |
| Peripheral artery disease | 250.7 Diabetes mellitus with peripheral circulatory disorders                                         | E11.51 T2D with diabetic peripheral angiopathy without gangrene                               |           | No                       |
|                           |                                                                                                       | E11.52 T2D with diabetic peripheral angiopathy with gangrene                                  |           | No                       |
|                           |                                                                                                       | E13.51 Other specified diabetes mellitus with diabetic peripheral angiopathy without gangrene |           | No                       |
|                           |                                                                                                       | E13.52 Other specified diabetes mellitus with diabetic peripheral angiopathy with gangrene    |           | No                       |
|                           | 443.29 Dissection of other artery                                                                     | I67.0 Dissection of cerebral arteries, non-ruptured                                           |           | No                       |
|                           | 440.xx Atherosclerosis                                                                                | I70.xx Atherosclerosis                                                                        |           | No                       |
|                           | 441.xx Aortic aneurysm and dissection                                                                 | I71.xx Aortic aneurysm and dissection                                                         |           | No                       |
|                           | 442.xx Other aneurysm                                                                                 | I72.xx Other aneurysm                                                                         |           | No                       |

|                              | <b>ICD9 diagnosis or procedure codes</b>          | <b>ICD10 diagnosis or procedure codes</b>                                                                                                                                                                                                                                                                                                                                                                   | <b>CPT/HCPCS</b>     | <b>Inpatient claim required</b> |
|------------------------------|---------------------------------------------------|-------------------------------------------------------------------------------------------------------------------------------------------------------------------------------------------------------------------------------------------------------------------------------------------------------------------------------------------------------------------------------------------------------------|----------------------|---------------------------------|
|                              | 443.xx Other peripheral vascular disease          | I73.xx Other peripheral vascular diseases                                                                                                                                                                                                                                                                                                                                                                   |                      | No                              |
|                              | 444.xx Arterial embolism and thrombosis           | I74.xx Arterial embolism and thrombosis                                                                                                                                                                                                                                                                                                                                                                     |                      | No                              |
|                              | 447.xx Other disorders of arteries and arterioles | I77.xx Other disorders of arteries and arterioles                                                                                                                                                                                                                                                                                                                                                           |                      | No                              |
|                              |                                                   | I79.xx Disorders of arteries, arterioles, and capillaries in diseases classified elsewhere                                                                                                                                                                                                                                                                                                                  |                      | No                              |
|                              | 557.0 Acute vascular insufficiency of intestine   | K55.0x Acute vascular disorders of intestine                                                                                                                                                                                                                                                                                                                                                                |                      | No                              |
|                              | 557.1 Chronic vascular insufficiency of intestine | K55.1 Chronic vascular disorders of intestine                                                                                                                                                                                                                                                                                                                                                               |                      | No                              |
|                              | 557.9 Other vascular insufficiency of intestine   | K55.8 Other vascular disorders of intestine                                                                                                                                                                                                                                                                                                                                                                 |                      | No                              |
|                              |                                                   | K55.9 Vascular disorders of intestine, unspecified                                                                                                                                                                                                                                                                                                                                                          |                      | No                              |
|                              |                                                   | M31.8 Other specified necrotizing vasculopathies                                                                                                                                                                                                                                                                                                                                                            |                      | No                              |
|                              |                                                   | M31.9 Necrotizing vasculopathy, unspecified                                                                                                                                                                                                                                                                                                                                                                 |                      | No                              |
| Coronary artery bypass graft | 36.1x, 36.2x                                      | ICD-10-PS 0212088, 0212089, 021208C, 0212098, 212099, 021209C, 02120A8, 02120A9, 02120AC, 02120J8, 02120J9, 02120JC, 02120K8, 02120K9, 02120KC, 02120Z8, 02120Z9, 02120ZC, 0212488, 0212489, 021248C, 0212498, 0212499, 021249C, 02124A8, 02124A9, 02124AC, 02124J8, 02124J9, 02124JC, 02124K8, 02124K9, 02124KC, 02124Z8, 02124Z9, 02124ZC, 0213088, 0213089, 021308C, 0213098, 0213099, 021309C, 02130A8, | 33545, 33510 – 33536 | Yes                             |

| ICD9 diagnosis or procedure codes | ICD10 diagnosis or procedure codes                                                                                                                                                                                                                                                                                                                                                                                                                                                                                                                                                                                                                                                                                                                                                                                                                                                                                                                                                                                                                                                                       | CPT/HCPCS | Inpatient claim required |
|-----------------------------------|----------------------------------------------------------------------------------------------------------------------------------------------------------------------------------------------------------------------------------------------------------------------------------------------------------------------------------------------------------------------------------------------------------------------------------------------------------------------------------------------------------------------------------------------------------------------------------------------------------------------------------------------------------------------------------------------------------------------------------------------------------------------------------------------------------------------------------------------------------------------------------------------------------------------------------------------------------------------------------------------------------------------------------------------------------------------------------------------------------|-----------|--------------------------|
|                                   | 02130A9, 02130AC,<br>02130J8, 02130J9,<br>02130JC, 02130K8,<br>02130K9, 02130KC<br>02130Z8, 02130Z9,<br>02130ZC, 0213488,<br>0213489, 021348C,<br>0213498, 0213499,<br>021349C, 02134A8,<br>02134A9, 02134AC<br>02134J8, 02134J9,<br>02134JC, 02134K8,<br>02134K9, 02134KC,<br>02134Z8, 02134Z9,<br>02134ZC, 021008F,<br>021009F, 02100AF,<br>02100JF, 02100KF,<br>02100ZF, 021048F,<br>021049F, 02104AF,<br>02104JF, 02104KF,<br>02104ZF, 021108F,<br>021109F, 02110AF,<br>02110JF, 02110KF,<br>02110ZF, 021148F,<br>021149F, 02114AF,<br>02114JF, 02114KF,<br>02114ZF, 021208F,<br>021209F, 02120AF,<br>02120JF, 02120KF,<br>02120ZF, 021248F,<br>021249F, 02124AF,<br>02124JF, 02124KF,<br>02124ZF, 021308F,<br>021309F, 02130AF,<br>02130JF, 02130KF,<br>02130ZF, 021348F,<br>021349F, 02134AF,<br>02134JF, 02134KF,<br>02134ZF, 0210083,<br>0210093, 02100A3,<br>02100J3, 02100K3,<br>02100Z3,0 210483,<br>0210493, 02104A3,<br>02104J3, 02104K3,<br>02104Z3,0 211083,<br>211093, 02110A3,<br>02110J3, 02110K3,<br>02110Z3, 0211483,<br>0211493, 02114A3,<br>02114J3, 02114K3,<br>02114Z3, 0212083, |           |                          |

| ICD9 diagnosis or procedure codes | ICD10 diagnosis or procedure codes                                                                                                                                                                                                                                                                                                                                                                                                                                                                                                                                                                                                                                                                                                                                                                                                                                                                                                                                                                                                                                                                   | CPT/HCPCS | Inpatient claim required |
|-----------------------------------|------------------------------------------------------------------------------------------------------------------------------------------------------------------------------------------------------------------------------------------------------------------------------------------------------------------------------------------------------------------------------------------------------------------------------------------------------------------------------------------------------------------------------------------------------------------------------------------------------------------------------------------------------------------------------------------------------------------------------------------------------------------------------------------------------------------------------------------------------------------------------------------------------------------------------------------------------------------------------------------------------------------------------------------------------------------------------------------------------|-----------|--------------------------|
|                                   | 0212093, 02120A3,<br>02120J3, 02120K3,<br>02120Z3, 0212483,<br>0212493, 02124A3,<br>02124J3, 02124K3,<br>02124Z3,0 213083,<br>0213093, 02130A3,<br>02130J3, 02130K3,<br>02130Z3, 0213483,<br>0213493, 02134A3,<br>02134J3, 02134K3,<br>02134Z3, 021008W,<br>021009W, 02100AW,<br>02100JW, 02100KW,<br>021048W, 021049W,<br>02104AW, 02104JW,<br>02104KW, 021108W,<br>021109W, 02110AW,<br>02110JW, 02110KW,<br>021148W, 021149W,<br>02114AW, 02114JW,<br>02114KW, 021208W,<br>021209W, 02120AW,<br>02120JW, 02120KW,<br>021248W, 021249W,<br>02124AW, 02124JW,<br>02124KW, 021308W,<br>021309W, 02130AW,<br>02130JW, 02130KW,<br>021348W, 021349W,<br>02134AW, 02134JW,<br>02134KW, 210088,<br>0210089, 021008C,<br>0210098, 0210099<br>021009C, 02100A8,<br>02100A9, 02100AC,<br>02100J8, 02100J9<br>02100JC, 02100K8,<br>02100K9, 02100KC,<br>02100Z8, 02100Z9<br>02100ZC, 0210488,<br>0210489, 021048C,<br>0210498, 0210499<br>021049C, 02104A8,<br>02104A9, 02104AC,<br>02104J8, 02104J9<br>02104JC, 02104K8,<br>02104K9, 02104KC,<br>02104Z8, 02104Z9<br>02104ZC, 021K0Z8,<br>021K0Z9, 021K0ZC, |           |                          |

|                                                               | ICD9 diagnosis or procedure codes          | ICD10 diagnosis or procedure codes                                                                                                                                                                                                                                                                                                                                                                                                                                        | CPT/HCPCS                                                                                                                                                                           | Inpatient claim required |
|---------------------------------------------------------------|--------------------------------------------|---------------------------------------------------------------------------------------------------------------------------------------------------------------------------------------------------------------------------------------------------------------------------------------------------------------------------------------------------------------------------------------------------------------------------------------------------------------------------|-------------------------------------------------------------------------------------------------------------------------------------------------------------------------------------|--------------------------|
|                                                               |                                            | 021K0ZF, 021K0ZW, 021K4Z8, 021K4Z9, 021K4ZC, 021K4ZF, 021K4ZW, 021L08P, 021L08Q, 021L08R, 021L09P, 021L09Q, 021L09R, 021L0AP, 021L0AQ, 021L0AR, 021L0JP, 021L0JQ, 021L0JR, 021L0KP, 021L0KQ, 021L0KR, 021L0Z8, 021L0Z9, 021L0ZC, 021L0ZF, 021L0ZP, 021L0ZQ, 021L0ZR, 021L48P, 021L48Q, 021L48R, 021L49P, 021L49Q, 021L49R, 021L4AP, 021L4AQ, 021L4AR, 021L4JP, 021L4JQ, 021L4JR, 021L4KP, 021L4KQ, 021L4KR, 021L4Z8, 021L4Z9, 021L4ZC, 021L4ZF, 021L4ZP, 021L4ZQ, 021L4ZR |                                                                                                                                                                                     |                          |
| Percutaneous coronary intervention (requires hospitalization) | ICD-9-PS 1755, 3606, 3607, 0040-0048, 0066 | ICD-10-PS 0270346, 027034Z, 0270356, 027035Z, 0270366, 027036Z, 0270376, 027037Z, 02703D6, 02703DZ, 02703E6, 02703EZ, 02703F6, 02703FZ, 02703G6, 02703GZ, 02703T6, 02703TZ, 02703Z6, 02703ZZ, 0270446, 027044Z, 0270456, 027045Z, 0270466, 027046Z, 0270476, 027047Z, 02704D6, 02704DZ, 02704E6, 02704EZ, 02704F6, 02704FZ, 02704G6, 02704GZ, 02704T6, 02704TZ, 02704Z6, 02704ZZ, 0271346, 027134Z, 0271356, 027135Z, 0271366, 027136Z, 0271376, 027137Z, 02713D6,        | 92920, 92921, 92924, 92925, 92928, 92929, 92933, 92934, 92937, 92938, 92941, 92943, 92944, 92973, 92975, 92977, 92980, 92981, 92982, 92984, 92995, 92996, C9600-C9608, G0290, G0291 | Yes                      |



| ICD9 diagnosis or procedure codes | ICD10 diagnosis or procedure codes                                                                                                                                                                                                                                                                                                                                                                                                                                                                                                                                                                                                                                                                                                                                                                                                                                                                                                                                                                                                                                                                          | CPT/HCPCS | Inpatient claim required |
|-----------------------------------|-------------------------------------------------------------------------------------------------------------------------------------------------------------------------------------------------------------------------------------------------------------------------------------------------------------------------------------------------------------------------------------------------------------------------------------------------------------------------------------------------------------------------------------------------------------------------------------------------------------------------------------------------------------------------------------------------------------------------------------------------------------------------------------------------------------------------------------------------------------------------------------------------------------------------------------------------------------------------------------------------------------------------------------------------------------------------------------------------------------|-----------|--------------------------|
|                                   | 02713DZ, 02713E6,<br>02713EZ, 02713F6,<br>02713FZ, 02713G6,<br>02713GZ, 02713T6,<br>02713TZ, 02713Z6,<br>02713ZZ, 0271446,<br>027144Z, 0271456,<br>027145Z, 0271466,<br>027146Z, 0271476,<br>027147Z, 02714D6,<br>02714DZ, 02714E6,<br>02714EZ, 02714F6,<br>02714FZ, 02714G6,<br>02714GZ, 02714T6,<br>02714TZ, 02714Z6,<br>02714ZZ, 0272346,<br>027234Z, 0272356,<br>027235Z, 0272366,<br>027236Z, 0272376,<br>027237Z, 02723D6,<br>02723DZ, 02723E6,<br>02723EZ, 02723F6,<br>02723FZ, 02723G6,<br>02723GZ, 02723T6,<br>02723TZ, 02723Z6,<br>02723ZZ, 0272446,<br>027244Z, 0272456,<br>027245Z, 0272466,<br>027246Z, 0272476,<br>027247Z, 02724D6,<br>02724DZ, 02724E6,<br>02724EZ, 02724F6,<br>02724FZ, 02724G6,<br>02724GZ, 02724T6,<br>02724TZ, 02724Z6,<br>02724ZZ, 0273346,<br>027334Z, 0273356,<br>027335Z, 0273366,<br>027336Z, 0273376,<br>027337Z, 02733D6,<br>02733DZ, 02733E6,<br>02733EZ, 02733F6,<br>02733FZ, 02733G6,<br>02733GZ, 02733T6,<br>02733TZ, 02733Z6,<br>02733ZZ, 0273446,<br>027344Z, 0273456,<br>027345Z, 0273466,<br>027346Z, 0273476,<br>027347Z, 02734D6,<br>02734DZ, 02734E6, |           |                          |

| ICD9 diagnosis or procedure codes | ICD10 diagnosis or procedure codes                                                                                                                                                          | CPT/HCPCS | Inpatient claim required |
|-----------------------------------|---------------------------------------------------------------------------------------------------------------------------------------------------------------------------------------------|-----------|--------------------------|
|                                   | 02734EZ, 02734F6, 02734FZ, 02734G6, 02734GZ, 02734T6, 02734TZ, 02734Z6, 02734ZZ, 02C03ZZ, 02C04ZZ, 02C13ZZ, 02C14ZZ, 02C23ZZ, 02C24ZZ, 02C33ZZ, 02C34ZZ, X2C0361, X2C1361, X2C2361, X2C3361 |           |                          |

**Abbreviations:** ASCVD – Atherosclerotic Cardiovascular Disease; CPT – Current Procedural Terminology; ESRD – End-stage Renal Disease; GPI – Generic Product Identifier; HCPCS – Healthcare Common Procedure Coding System; ICD – International Classification of Diseases; LOINC - Logical Observation Identifiers, Names, and Codes; MI – Myocardial Infarction; T2D – Type 2 Diabetes

**Table S2: Codes for Risk Factors for ASCVD/Heart Failure**

|                                           | ICD-9/ICD-9 CM Codes                                                                                                                                                                                      | ICD-10 Code                                                                                                                                                                                                                                                  | GPI Codes/LOINC Codes/CPT Codes/HCPCS Codes                     |
|-------------------------------------------|-----------------------------------------------------------------------------------------------------------------------------------------------------------------------------------------------------------|--------------------------------------------------------------------------------------------------------------------------------------------------------------------------------------------------------------------------------------------------------------|-----------------------------------------------------------------|
| Chronic kidney disease: Diagnosis         | 585.1-585.4                                                                                                                                                                                               | N18.1, N18.2, N18.3, N18.4,                                                                                                                                                                                                                                  |                                                                 |
| Serum creatinine to calculate eGFR        |                                                                                                                                                                                                           |                                                                                                                                                                                                                                                              | LOINC: 2160-0                                                   |
| Hypertension                              | 401.xx Essential hypertension<br>402.xx Hypertensive heart disease<br>403.xx Hypertensive chronic kidney disease<br>404.xx Hypertensive heart and chronic kidney disease<br>405.xx Secondary hypertension | I10.xx Essential hypertension<br>I11.xx Hypertension and hypertensive heart disease<br>I12.xx Hypertension and chronic kidney disease<br>I13.xx Hypertensive heart and chronic kidney disease<br>I15.xx Secondary hypertension<br>I16.xx Hypertensive crisis |                                                                 |
| Antihypertensives                         |                                                                                                                                                                                                           |                                                                                                                                                                                                                                                              | GPI Codes                                                       |
| Angiotensin Converting Enzyme Inhibitors, |                                                                                                                                                                                                           |                                                                                                                                                                                                                                                              | 3610, 3615, 3617                                                |
| Angiotensin II Receptor Blockers,         |                                                                                                                                                                                                           |                                                                                                                                                                                                                                                              |                                                                 |
| Renin inhibitors                          |                                                                                                                                                                                                           |                                                                                                                                                                                                                                                              | 33*                                                             |
| Beta blockers                             |                                                                                                                                                                                                           |                                                                                                                                                                                                                                                              | 34*                                                             |
| Calcium channel blockers                  |                                                                                                                                                                                                           |                                                                                                                                                                                                                                                              |                                                                 |
| Diuretics                                 |                                                                                                                                                                                                           |                                                                                                                                                                                                                                                              | 37*                                                             |
| Other antihypertensives                   |                                                                                                                                                                                                           |                                                                                                                                                                                                                                                              | 3620* - 3699*<br>(anything in 36* that is not 3610, 3615, 3617) |
| Vasopressors                              |                                                                                                                                                                                                           |                                                                                                                                                                                                                                                              | 38*                                                             |
| Hyperlipidemia                            | 272.x Hyperlipidemia                                                                                                                                                                                      | E78.0x Pure hypercholesterolemia<br>E78.1 Pure hyperglyceridemia<br>E78.2 Mixed hyperlipidemia<br>E78.3 Hyperchylomicronemia<br>E78.4 Other hyperlipidemia<br>E78.5 Hyperlipidemia, unspecified                                                              |                                                                 |
| Statins                                   |                                                                                                                                                                                                           |                                                                                                                                                                                                                                                              | GPI: 3940, 39940<br>(combinations with statin and ezetimibe)    |

|                            | ICD-9/ICD-9 CM Codes                                                                                                | ICD-10 Code                                                 | GPI Codes/LOINC Codes/CPT Codes/HCPCS Codes                                              |
|----------------------------|---------------------------------------------------------------------------------------------------------------------|-------------------------------------------------------------|------------------------------------------------------------------------------------------|
| Micro- or macroalbuminuria | 791.0 Proteinuria                                                                                                   | R80.xx Proteinuria                                          |                                                                                          |
|                            | 585.3 Chronic kidney disease, stage 3                                                                               | N18.3 Chronic kidney disease, stage 3                       |                                                                                          |
|                            | 585.4 Chronic kidney disease, stage 4                                                                               | N18.4 Chronic kidney disease, stage 4                       |                                                                                          |
|                            | 585.5 Chronic kidney disease, stage 5                                                                               | N18.5 Chronic kidney disease, stage 5                       |                                                                                          |
| Obesity                    | 278.00 Obesity, unspecified                                                                                         | E66.0x Obesity due to excess calories                       |                                                                                          |
|                            | 278.01 Morbid obesity                                                                                               | E66.2 Morbid (severe) obesity with alveolar hypoventilation |                                                                                          |
|                            | 278.03 Obesity hypoventilation syndrome                                                                             | E66.8 Other obesity                                         |                                                                                          |
|                            | V85.3x Body mass index 30-39                                                                                        | E66.9 Obesity, unspecified                                  |                                                                                          |
|                            | V85.4x Body mass index 40 and over                                                                                  | Z68.3x Body mass index 30-39                                |                                                                                          |
|                            |                                                                                                                     | Z68.4x Body mass index 40 or greater                        |                                                                                          |
| Smoking                    | 305.1 Non-dependent tobacco use disorder                                                                            |                                                             | CPT: 1034F, 4000F, 99406                                                                 |
|                            | 649.0 Tobacco use disorder complicating pregnancy, childbirth, or the puerperium                                    |                                                             | HCPCS: C9801, C9802, D1320, G0375, G0436, G0437, G8402, G8403, G8453–G8455, S9075, S9453 |
|                            | 649.00–649.04 Tobacco use disorder complicating pregnancy, childbirth, or the puerperium, unspecified as to episode |                                                             |                                                                                          |
|                            | 989.84 Toxic effect of tobacco                                                                                      |                                                             |                                                                                          |
|                            | E869.4 Accidental poisoning second-hand tobacco smoke                                                               |                                                             |                                                                                          |
|                            | V15.82 Personal history of tobacco use, presenting hazards to health                                                |                                                             |                                                                                          |
|                            | V65.42 Counseling on substance use and abuse                                                                        |                                                             |                                                                                          |

**Abbreviations:** CPT – Current Procedural Terminology; eGFR – Estimated Glomerular Filtration Rate; GPI – Generic Product Identifier; HCPCS – Healthcare Common Procedure Coding System; ICD – International Classification of Diseases; ICD-9 CM – International Classification of Diseases Ninth edition Clinical Modification; LOINC - Logical Observation Identifiers, Names, and Codes

**Table S3: Medication Codes**

| <b>Variable</b>                                                                              | <b>Description</b>                                                                    | <b>LOINC/CPT/GPI codes</b>                                     |
|----------------------------------------------------------------------------------------------|---------------------------------------------------------------------------------------|----------------------------------------------------------------|
| <b>Glucose-lowering medication classes</b>                                                   | <b>Drugs in class</b>                                                                 | <b>GPI code</b>                                                |
| Biguanides                                                                                   | Metformin                                                                             | 2725*                                                          |
| Sulfonylureas                                                                                | Chlorpropamide, glimepiride, glipizide, glyburide, glyburide, tolazamide, tolbutamide | 2720*                                                          |
| Thiazolidinediones                                                                           | Pioglitazone, rosiglitazone                                                           | 2760*                                                          |
| Amylin agonists                                                                              | Pramlintide                                                                           | 2715*                                                          |
| Meglitinides                                                                                 | Repaglinide, nateglinide                                                              | 2723*, 2728*                                                   |
| Alpha-glucosidase inhibitors                                                                 | Acarbose, miglitol                                                                    | 2750*                                                          |
| Glucagon-like peptide-1 receptor agonists                                                    | Exenatide, liraglutide, dulaglutide, injectable semaglutide                           | 2717*                                                          |
| Dipeptidyl peptidase-4 inhibitors                                                            | Sitagliptin, saxagliptin, linagliptin                                                 | 2755*                                                          |
| Sodium-glucose co-transporter 2 inhibitors                                                   | Canagliflozin, dapagliflozin, empagliflozin                                           | 2770*                                                          |
| Insulin                                                                                      | many                                                                                  | 2710*                                                          |
| Combination oral antidiabetics                                                               | many                                                                                  | 2799*                                                          |
| <b>CV Therapies (Class-level)</b>                                                            |                                                                                       | <b>GPI codes</b>                                               |
| Angiotensin Converting Enzyme Inhibitors, Angiotensin II Receptor Blockers, Renin inhibitors |                                                                                       | 3610, 3615, 3617                                               |
| Beta blockers                                                                                |                                                                                       | 33*                                                            |
| Calcium channel blockers                                                                     |                                                                                       | 34*                                                            |
| Diuretics                                                                                    |                                                                                       | 37*                                                            |
| Other antihypertensives                                                                      |                                                                                       | 3620*- 3699*<br>(anything in 36* that is not 3610, 3615, 3617) |
| Vasopressors                                                                                 |                                                                                       | 38*                                                            |
| Statins                                                                                      |                                                                                       | 3940, 39940<br>(combinations with statin and ezetimibe)        |
| Fibrates                                                                                     |                                                                                       | 3920                                                           |
| Antianginal agents                                                                           |                                                                                       | GPI 2: 32                                                      |
| Antiarrhythmics                                                                              |                                                                                       | GPI 3: 35                                                      |
| Anticoagulants                                                                               |                                                                                       | GPI 2: 83                                                      |
| Cardiotonics                                                                                 |                                                                                       | GPI 2: 31                                                      |

**Abbreviations:** CV – Cardiovascular; CPT – Current Procedural Terminology; GPI – Generic Product Identifier; LOINC - Logical Observation Identifiers, Names, and Codes
